# Supplementary material for: Understanding the Threats Posed by Non-Native Species: Public vs. Conservation Managers
Source: PLoS One. 2013 Jan 16;8(1):e53200. doi: 10.1371/journal.pone.0053200 (PMC3547005; doi:10.1371/journal.pone.0053200)
Supplement: Dataset S1 — Data obtained from perception questionnaire. (XLS) [file pone.0053200.s002.xls]

## Sheet: Sheet1
Group	Answer/Question
Conservation Professionals	1	1	0	0	0	0	2	7	8	32	45	0	2	1	13	18	0	0	1	1	7	26	23
Conservation Professionals	2	4	2	1	7	2	8	15	8	34	32	15	5	5	16	21	1	3	4	7	21	27	36
Conservation Professionals	3	24	42	14	35	12	54	56	42	49	26	44	30	26	58	48	15	39	18	34	48	79	73
Conservation Professionals	4	44	55	45	58	27	53	32	43	15	18	53	53	48	35	28	48	47	58	52	34	0	0
Conservation Professionals	5	59	33	72	32	91	15	22	31	2	11	20	42	52	10	17	68	43	51	38	22	0	0
N		132	132	132	132	132	132	132	132	132	132	132	132	132	132	132	132	132	132	132	132	132	132
Anglers	1	3	1	0	1	0	2	11	6	31	31	4	7	4	15	16	0	1	0	0	7	12	31
Anglers	2	12	3	2	8	1	3	7	4	30	30	10	4	1	17	25	3	10	9	8	26	8	20
Anglers	3	26	28	16	35	15	39	38	27	26	27	28	21	13	36	30	9	27	25	28	31	83	52
Anglers	4	29	45	42	41	33	42	35	37	13	11	37	36	35	28	22	33	32	28	29	20	0	0
Anglers	5	33	26	43	18	54	17	12	29	3	4	24	35	50	7	10	58	33	41	38	19	0	0
N		103	103	103	103	103	103	103	103	103	103	103	103	103	103	103	103	103	103	103	103	103	103
General Public	1	5	1	1	4	1	4	46	57	73	140	11	33	35	48	83	5	7	8	7	21	95	61
General Public	2	13	8	5	25	9	25	42	42	43	29	31	20	32	33	36	15	14	17	19	43	20	16
General Public	3	39	49	35	91	33	92	66	65	49	12	62	47	53	58	48	32	63	75	76	66	72	110
General Public	4	61	86	68	53	60	47	25	17	15	4	51	53	46	31	12	69	68	53	55	33	0	0
General Public	5	69	43	78	14	84	19	8	6	7	2	32	34	21	17	8	66	34	34	30	24	0	0
N		187	187	187	187	187	187	187	187	187	187	187	187	187	187	187	187	186	187	187	187	187	187
